# Supplementary material for: Design, synthesis, and characterization of a new hybrid organic–inorganic perovskite with a high-Tc dielectric transition
Source: Royal Society of Chemistry journal article supplement (doi:10.1039/d2dt03503k), 2022-12-17
Supplement: d2dt03503k1.pdf [file d2dt03503k1.pdf]

## Electronic Supplementary Information

### Design, synthesis and characterization of a new organic-inorganic hybrid perovskite with high- $T_c$ dielectric transition

Zhuoer Cai,<sup>a</sup> Xinyi Zhang,<sup>a</sup> Shiyue Xiao,<sup>a</sup> Shuwang Ge,<sup>a</sup> Xianmin Liu,<sup>a</sup> Yinan Zhang,<sup>a</sup> Long Chen,<sup>c</sup> Xiu-Ni Hua\*<sup>b</sup> and Baiwang Sun\*<sup>a</sup>

<sup>a</sup> School of Chemistry and Chemical Engineering, Southeast University, Nanjing 211189, P. R. China. Fax: +86 25 52090614, Tel: +86 25 52090614, E-mail address: chmsunbw@seu.edu.cn

<sup>b</sup> School of Environmental Science, Nanjing Xiaozhuang University, Nanjing 211171, P. R. China. E-mail address: huaxiuni@njxzc.edu.cn

<sup>c</sup> Key Laboratory for Advanced Materials and Institute of Fine Chemicals, School of Chemistry and Molecular Engineering, East China University of Science and Technology, 130 Meilong Road, Shanghai 200237, P. R. China.

## Contents:

**Fig. S1**  $^1\text{H-NMR}$  of TEACl.

**Fig. S2** Infrared spectrum of **1** at room temperature.

**Fig. S3** Measured and simulated powder X-ray diffraction patterns of **1**.

**Fig. S4** Imaginary part of the dielectric permittivity of **1**.

**Fig. S5** Real part of the dielectric permittivity of **1** using silver paste.

**Table. S1** The Values of the  $T_g$ ,  $\Delta\varepsilon'$ ,  $\varepsilon'$ , excitonic absorption, bandgap and photoluminescence for Selected Hybrid organic-inorganic.

**Table. S2** Basic crystal structure of **1** at 296 K and 410 K.

**Table. S3** Selected bond lengths for **1** at 296 K.

**Table. S4** Selected angles [ $^\circ$ ] for **1** at 296 K.

**Table. S5** Selected bond lengths for **1** at 410 K.

**Table. S6** Selected angles [ $^\circ$ ] for **1** at 410 K.

**<sup>1</sup>H NMR measurement.** All chemicals were purchased from commercial suppliers and were used without further purification. NMR spectra were measured on a Bruker AVANCE II (MALDI-TOF) spectrometer (600 MHz for <sup>1</sup>H NMR) and DMSO was used as a solvent. <sup>1</sup>H NMR of **1** is shown in **Fig. S1**. <sup>1</sup>H NMR (600 MHz, DMSO) δ 5.38 (s, 1H), 3.38 (q, *J* = 7.3 Hz, 3H), 1.24 (t, *J* = 7.3 Hz, 5H).

**Infrared measurement.** Infrared measurement was carried on a Thermo-fisher Scientific Nicolet5700. Measurement range of wavelength is from 400 nm to 3800 nm (**Fig. S2**).

**Powder X-ray diffraction (PXRD) measurements.** Rigaku Ultima IV Powder X-Ray Diffractometer was used to check the phase purity of desired compound. The experimental PXRD patterns were recorded in the 2θ range of 5°-45° with a speed of 5°/min. As shown in **Fig. S3**, the consistency between the simulation and the actual measurement results confirmed the high purity of the sample.

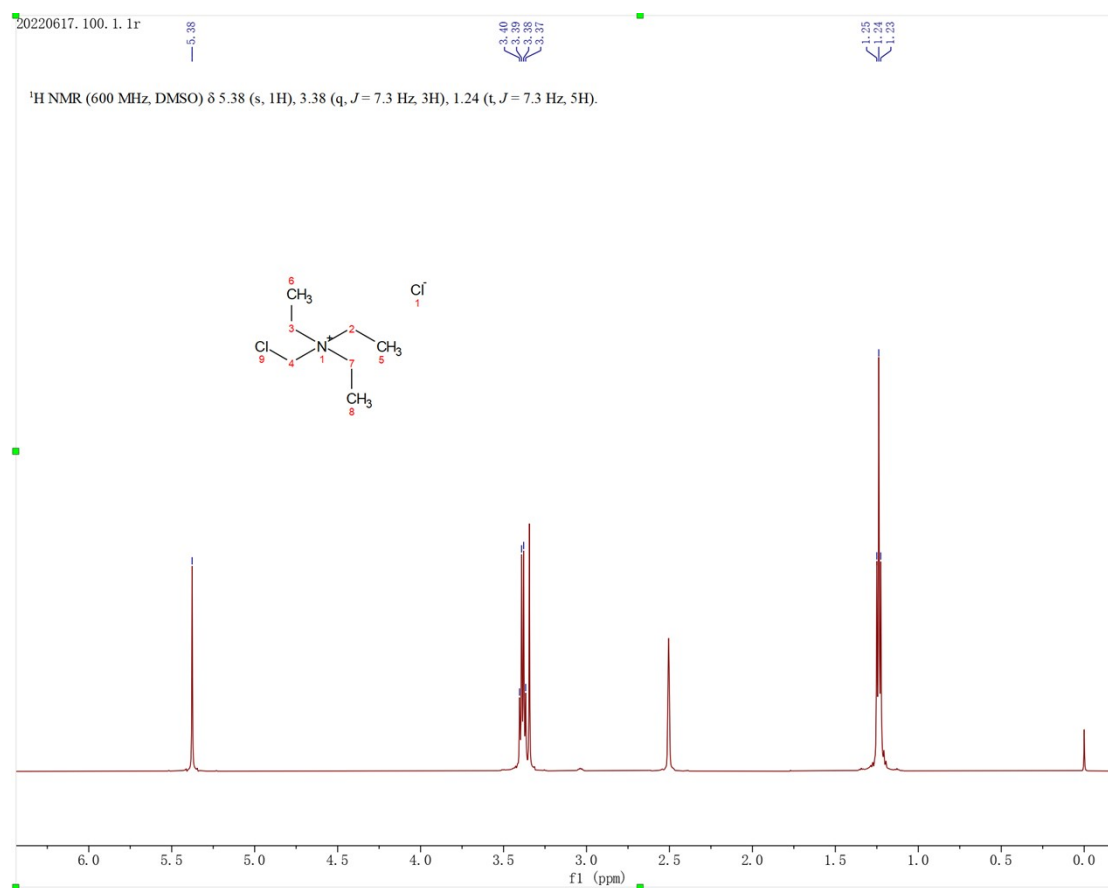

**Fig. S1** <sup>1</sup>H-NMR of TEAClCl.

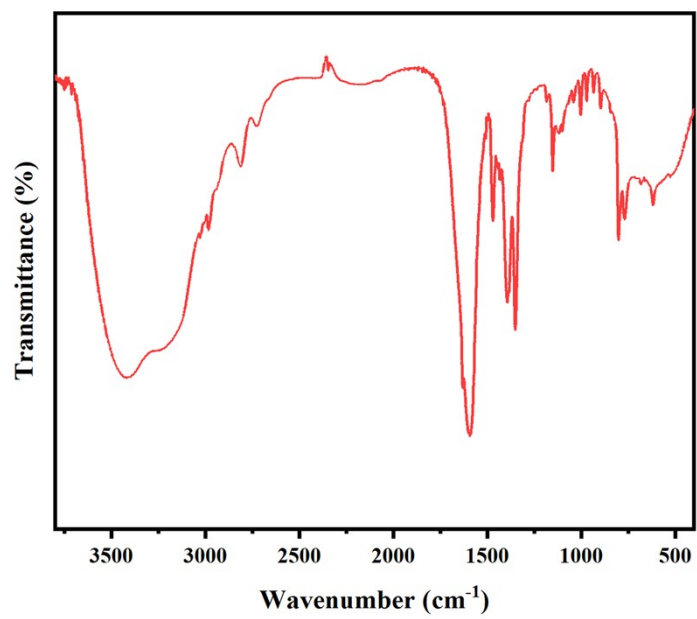

Figure. S2 Infrared spectrum of **1** at room temperature.

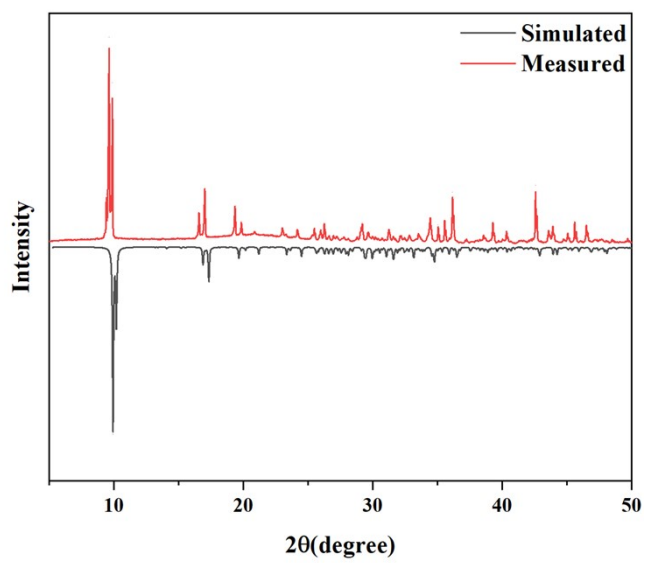

Figure. S3 Measured and simulated powder X-ray diffraction patterns of **1**.

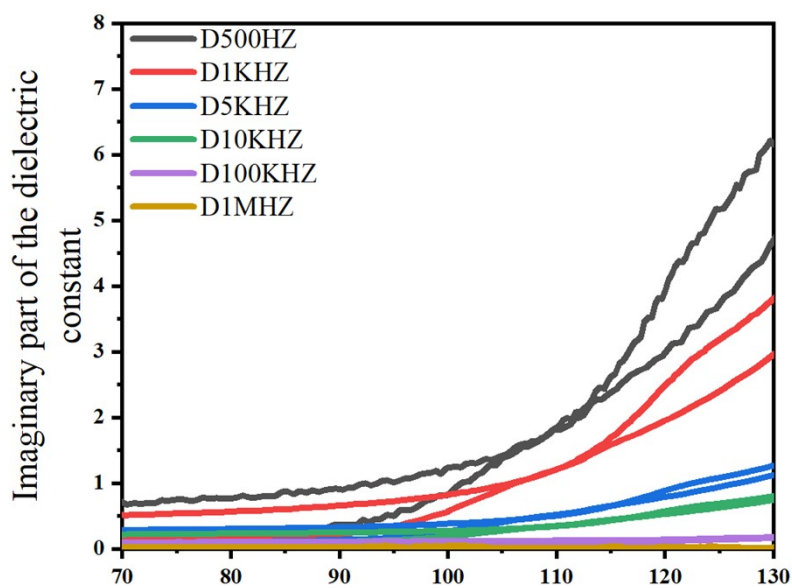

Fig. S4 Imaginary part of the dielectric permittivity of **1**.

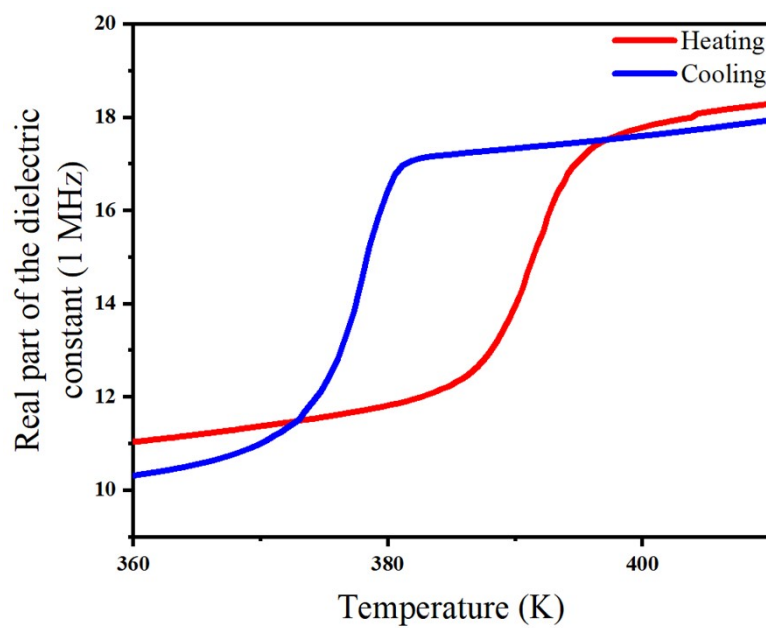

Fig. S5 Real part of the dielectric permittivity of **1** using silver paste.

**Table. S1** The Values of the  $T_c$ ,  $\Delta\epsilon'$ ,  $\epsilon'$ , excitonic absorption, bandgap and photoluminescence for Selected Hybrid organic-inorganic.

| Material                             | $T_c$ (K) | $\epsilon'$ (LT) | $\epsilon'$ (HT) | Excitonic absorption (nm, eV) | Band gap (eV) | emission (nm) | Stokes shift (nm) | Ref |
|--------------------------------------|-----------|------------------|------------------|-------------------------------|---------------|---------------|-------------------|-----|
| (FTEA)PbBr <sub>3</sub>              | 378       | 9.9              | 18.3             | 311 (3.99)                    | 3.48          | 670           | 390               | 1   |
| (Et <sub>4</sub> N)PbBr <sub>3</sub> | 367       | 10.0             | 16.1             | -                             | -             | -             | 373               | 2   |
| PyrPbI <sub>3</sub>                  | 262.2     | 10               | 14               | -                             | 2.62          | 680           | 305               | 3   |
| IMPbBr <sub>3</sub>                  | 200       | 10               | 14               | 388 (3.20)                    | 3.34          | 688           | 194               | 4   |

|                                       |        |      |      |            |      |     |     |                  |
|---------------------------------------|--------|------|------|------------|------|-----|-----|------------------|
| CEPbBr <sub>3</sub>                   | 300.06 | 7.5  | 11.0 | -          | 3.33 | 385 | 133 | 5                |
| BEPbBr <sub>3</sub>                   | 286.08 | 3.4  | 6.0  | -          | 3.24 | 391 | 138 | 6                |
| Pyr <sub>2</sub> KCr(CN) <sub>6</sub> | 234.1  | 38.5 | 67.5 | -          | 3.85 | 804 | 538 | 7                |
| (TEACCl)PbBr <sub>3</sub>             | 359    | 11.2 | 15.3 | 314 (3.94) | 3.57 | 715 |     | <b>This work</b> |

**Table. S2** Crystal structure of **1** at 296 K and 410 K.

|                                                              |                                      |                                      |
|--------------------------------------------------------------|--------------------------------------|--------------------------------------|
| Temperature (K)                                              | 296                                  | 410                                  |
| Crystal system                                               | Monoclinic                           | Hexagonal                            |
| CCDC Number                                                  | 2212352                              | 2212353                              |
| Space group                                                  | <i>P2<sub>1</sub>/c</i>              | <i>P6<sub>3</sub>/mmc</i>            |
| <i>a</i> / Å                                                 | 10.8678(4)                           | 10.570(2)                            |
| <i>b</i> / Å                                                 | 35.6850(15)                          | 10.570(2)                            |
| <i>c</i> / Å                                                 | 7.7853(3)                            | 7.9754(16)                           |
| $\alpha$ / °                                                 | 90                                   | 90                                   |
| $\beta$ / °                                                  | 100.9530(10)                         | 90                                   |
| $\gamma$ / °                                                 | 90                                   | 120                                  |
| Volume / (Å <sup>3</sup> )                                   | 2964.3(2)                            | 771.673                              |
| <i>Z</i>                                                     | 8                                    | 2                                    |
| Radiation                                                    | Mo-K $\alpha$ ( $\lambda$ = 0.71073) | Mo-K $\alpha$ ( $\lambda$ = 0.71073) |
| $\rho_{\text{calc}}$ / g cm <sup>-3</sup>                    | 2.678                                | 2.572                                |
| <i>F</i> (000)                                               | 2160.0                               | 540.0                                |
| Goodness-of-fit on <i>F</i> <sup>2</sup>                     | 1.018                                | 1.034                                |
| <i>R</i> <sub>1</sub> [ <i>I</i> > 2 $\sigma$ ( <i>I</i> )]  | 0.0409                               | 0.0893                               |
| <i>wR</i> <sub>2</sub> [ <i>I</i> > 2 $\sigma$ ( <i>I</i> )] | 0.0782                               | 0.2454                               |
| <i>R</i> <sub>int</sub>                                      | 0.0562                               | 0.078                                |

**Table. S3** Selected bond lengths for **1** at 296 K.

| Atom1 | Atom2 | Length   | Atom1 | Atom2 | Length  |
|-------|-------|----------|-------|-------|---------|
| Pb1   | Br1   | 2.998    | C7    | Cl1   | 1.70(1) |
| Pb1   | Br2   | 3.061    | C7    | N1    | 1.51(1) |
| Pb1   | Br3   | 3.041    | C8    | C9    | 1.56(2) |
| Pb2   | Br1   | 2.984    | C8    | N2    | 1.51(1) |
| Pb2   | Br2   | 3.058    | C10   | C11   | 1.61(2) |
| Pb2   | Br3   | 3.047    | C10   | N2    | 1.50(2) |
| Pb3   | Br4   | 3.067(1) | C12   | C13   | 1.58(2) |
| Pb3   | Br5   | 3.029(1) | C12   | N2    | 1.51(1) |
| Pb3   | Br6   | 2.947(1) | C14   | Cl2   | 1.72(1) |
| C1    | C2    | 1.54(1)  | C14   | N2    | 1.51(1) |
| C2    | N1    | 1.53(1)  | C5    | C6    | 1.60(1) |
| C3    | C4    | 1.53(2)  | C5    | N1    | 1.50(1) |
| C3    | N1    | 1.52(1)  |       |       |         |

**Table. S4** Selected angles [°] for **1** at 296 K.

| Atom1 | Atom2 | Atom3 | Angle    | Atom1 | Atom2 | Atom3 | Angle     |
|-------|-------|-------|----------|-------|-------|-------|-----------|
| Br1   | Pb1   | Br2   | 84.45    | C6    | C5    | N1    | 115.4(8)  |
| Br1   | Pb1   | Br3   | 84.17    | Cl1   | C7    | N1    | 114.0(7)  |
| Br1   | Pb1   | Br1   | 180      | C2    | N1    | C3    | 110.3(7)  |
| Br1   | Pb1   | Br2   | 95.55    | C2    | N1    | C5    | 107.6(7)  |
| Br1   | Pb1   | Br3   | 95.83    | C2    | N1    | C7    | 111.4(7)  |
| Br2   | Pb1   | Br3   | 80.6     | C3    | N1    | C5    | 111.8(7)  |
| Br2   | Pb1   | Br1   | 95.55    | C3    | N1    | C7    | 104.7(7)  |
| Br2   | Pb1   | Br2   | 180      | C5    | N1    | C7    | 111.0(7)  |
| Br2   | Pb1   | Br3   | 99.4     | C9    | C8    | N2    | 116.3(9)  |
| Br3   | Pb1   | Br1   | 95.83    | C11   | C10   | N2    | 115(1)    |
| Br3   | Pb1   | Br2   | 99.4     | C13   | C12   | N2    | 116.2(9)  |
| Br3   | Pb1   | Br3   | 180      | Cl2   | C14   | N2    | 112.8(7)  |
| Br1   | Pb1   | Br2   | 84.45    | C8    | N2    | C10   | 111.4(8)  |
| Br1   | Pb1   | Br3   | 84.17    | C8    | N2    | C12   | 107.6(8)  |
| Br2   | Pb1   | Br3   | 80.6     | C8    | N2    | C14   | 110.8(8)  |
| Br1   | Pb2   | Br2   | 84.76    | C10   | N2    | C12   | 111.2(8)  |
| Br1   | Pb2   | Br3   | 84.3     | C10   | N2    | C14   | 105.7(8)  |
| Br1   | Pb2   | Br1   | 180      | C12   | N2    | C14   | 110.1(8)  |
| Br1   | Pb2   | Br2   | 95.24    | Br5   | Pb3   | Br5   | 98.03(3)  |
| Br1   | Pb2   | Br3   | 95.7     | Br5   | Pb3   | Br6   | 99.90(3)  |
| Br2   | Pb2   | Br3   | 80.55    | Br6   | Pb3   | Br4   | 94.27(3)  |
| Br2   | Pb2   | Br1   | 95.24    | Br6   | Pb3   | Br5   | 94.51(3)  |
| Br2   | Pb2   | Br2   | 180      | Br6   | Pb3   | Br6   | 175.10(3) |
| Br2   | Pb2   | Br3   | 99.45    | Br4   | Pb3   | Br5   | 84.14(4)  |
| Br3   | Pb2   | Br1   | 95.7     | Br4   | Pb3   | Br6   | 81.64(3)  |
| Br3   | Pb2   | Br2   | 99.45    | Br5   | Pb3   | Br6   | 82.42(3)  |
| Br3   | Pb2   | Br3   | 180      | Pb3   | Br4   | Pb3   | 79.71(3)  |
| Br1   | Pb2   | Br2   | 84.76    | Pb3   | Br5   | Pb3   | 80.93(3)  |
| Br1   | Pb2   | Br3   | 84.3     | Pb3   | Br6   | Pb3   | 79.84(3)  |
| Br2   | Pb2   | Br3   | 80.55    | C1    | C2    | N1    | 117.0(8)  |
| Pb1   | Br1   | Pb2   | 81.19    | C4    | C3    | N1    | 115.2(8)  |
| Pb1   | Br2   | Pb2   | 79       | Br4   | Pb3   | Br5   | 84.14(4)  |
| Pb1   | Br3   | Pb2   | 79.49    | Br4   | Pb3   | Br6   | 81.64(3)  |
| Pb1   | Br1   | Pb2   | 81.19    | Br5   | Pb3   | Br6   | 82.42(3)  |
| Pb1   | Br2   | Pb2   | 79       | Br4   | Pb3   | Br6   | 83.45(3)  |
| Pb1   | Br3   | Pb2   | 79.49    | Br4   | Pb3   | Br4   | 95.69(4)  |
| Br1   | Pb2   | Br2   | 84.76    | Br4   | Pb3   | Br5   | 177.94(4) |
| Br1   | Pb2   | Br3   | 84.3     | Br4   | Pb3   | Br6   | 99.60(3)  |
| Br2   | Pb2   | Br3   | 80.55    | Br5   | Pb3   | Br6   | 84.28(3)  |
| Br4   | Pb3   | Br5   | 82.10(3) | Br5   | Pb3   | Br4   | 177.47(4) |

Symmetry codes:

#1 = -x+1, -y+1, -z+1;

#2 = -x+1, -y+1, -z+2;

#3 = x, -y+1/2, z+1/2;

#4 = x, -y+1/2, z-1/2.

**Table. S5** Selected bond lengths for **1** at 410 K.

| Atom1 | Atom2 | Length | Atom1 | Atom2 | Length |
|-------|-------|--------|-------|-------|--------|
| Pb1   | Br1   | 3.026  | C5    | Cl1   | 1.7(1) |
| C2    | N9    | 1.5(1) | C2    | C1    | 1.5(3) |
| C3    | N9    | 1.5(1) | C6    | C7    | 1.5(1) |
| C5    | N9    | 1.4(9) | C3    | C4    | 1.4(1) |
| C6    | N9    | 1.5(1) |       |       |        |

**Table. S6** Selected angles [°] for **1** at 410 K.

| Atom1 | Atom2 | Atom3 | Angle    | Atom1 | Atom2 | Atom3 | Angle    |
|-------|-------|-------|----------|-------|-------|-------|----------|
| Br1   | Pb1   | Br2   | 81.3(0)  | C3    | N1    | C6    | 110.1(4) |
| C2    | N1    | C3    | 109.3(2) | N1    | C5    | Cl1   | 114.4(9) |
| C2    | N1    | C5    | 109.1(3) | N1    | C6    | C7    | 118.5(5) |
| C2    | N1    | C6    | 109.4(2) | N1    | C2    | C1    | 117.5(6) |
| C3    | N1    | C5    | 109.2(9) | N1    | C3    | C4    | 120.8(6) |

Symmetry codes:

#1 = x, -y, 2-z;

#2 = +y-x, -x, +z;

#3 = -y, +x-y, +z;

#4 = +y, -x+y, 2-z;

#5 = -y+x, +x, 2-z;

#6 = -x, -y, 1/2+z.

## References

- 1 F. F. Di, H. Peng, H. Zhang, X. Q. Huang, W. J. Chen, Y. L. Liu and Y. Y. Tang, *Mater. Chem. Front.*, 2021, **5**, 2842-2848.
- 2 Y. Huang, J. Yang, Z. J. Li, K. Qian and F. Sao, *Rsc Adv.*, 2019, **9**, 10364-10370.
- 3 K. Fedoruk, S. J. Zelewski, J. K. Zaręba, M. Ptak, M. Mączka and A. Sieradzki, *J Mater Chem C*, 2022, **10**, 10519-10529.
- 4 S. Smółka, M. Mączka, D. Drozdowski, D. Stefańska, A. Gągor, A. Sieradzki, J. K. Zaręba and M. Ptak, *Inorg Chem*, 2022, **61**, 15225-15238.
- 5 D.-F. Li, P.-J. Zhao, X.-H. Deng, Y.-Z. Wu, X.-L. He, D.-S. Liu, Y.-X. Li and Y. Sui, *New J Chem*, 2022, **46**, 19391-19400.
- 6 D.-F. Li, X.-H. Deng, Y.-X. Ma, D.-S. Liu, X.-F. Huang, X.-F. Zhao, W.-T. Chen and Y. Sui, *The Journal of Physical Chemistry C*, 2022, **126**, 728-736.
- 7 M. Mączka, A. Nowok, J. K. Zaręba, D. Stefańska, A. Gągor, M. Trzebiatowska and A. Sieradzki, *Acs Appl Mater Inter*, 2022, **14**, 1460-1471.
